# Supplementary material for: Efficient Production Strategy of a Novel Postbiotic Produced by Bacillus subtilis and Its Antioxidant and Anti-Inflammatory Effects
Source: MDPI journal article supplement (doi:10.3390/molecules30102089), 2025-05-08
Supplement: s1 [file molecules-3589741-supplementary.pdf › molecules-3589741-supplementary.pdf]

## Supplementary materials

Table S1. Primer sequences used for qRT-PCR in this study.

| Gene                           | Forward/Reverse | Sequence (5'-3')               | Accession number | Product length |
|--------------------------------|-----------------|--------------------------------|------------------|----------------|
| <i>iNOS</i>                    | F               | CAGCGGAGTGACGGCAAACAT          | AY090567.1       | 184            |
|                                | R               | GCAAGACCAGAGGCAGCACATC         |                  |                |
| <i>COX2</i>                    | F               | ATCAGGTCATTGGTGGAGAGGTGTAT     | NM_011198.4      | 237            |
|                                | R               | TGCTGGTTTGGAAATAGTTGCTCATCA    |                  |                |
| <i>IL-1<math>\beta</math></i>  | F               | AATCTCGCAGCAGCACATCAACA        | NM_008361.3      | 197            |
|                                | R               | ACACCAGCAGGTTATCATCATCATCC     |                  |                |
| <i>IL-6</i>                    | F               | GCTACCTGGAGTACATGAAGAACAACCTTA | NM_031168.2      | 216            |
|                                | R               | AGATGAATTGGATGGTCTTGGTCCTTAG   |                  |                |
| <i>TNF-<math>\alpha</math></i> | F               | GCCCAGACCCTCACACTCAGAT         | NM_013693.2      | 220            |
|                                | R               | AGCCTTGTCCTTGAAGAGAACCT        |                  |                |
| <i>TLR4</i>                    | F               | TGTGTCAGTGGTCAGTGTGATTGTG      | NM_021297.2      | 225            |
|                                | R               | CTGTAGTGAAGGCAGAGGTGAAAGC      |                  |                |
| <i>MyD88</i>                   | F               | GACGATTATCTACAGAGCAAGGAATGTGA  | NM_010851.3      | 151            |
|                                | R               | CGCATATAGTGATGAACCGCAGGAT      |                  |                |
| <i>NF-<math>\kappa</math>B</i> | F               | GTCTTACACTTAGCCATCATCCACCTC    | NM_008689.2      | 165            |
|                                | R               | ATCCTCTACTACATCTTCCTGCTTGGT    |                  |                |
| <i>GAPDH</i>                   | F               | GTGAAGGTCGGTGTGAACGGATT        | GU214026.1       | 235            |
|                                | R               | GGTCTCGCTCCTGGAAGATGGT         |                  |                |
